1 **Maternal alum-adjuvanted recombinant HIV Env vaccine does not enhance**  
2 **autologous virus neutralization in HIV-infected pregnant women**

3  
4 Eliza D. Hompe<sup>a,\*</sup>, Jesse F. Mangold<sup>a,\*</sup>, Joshua A. Eudailey<sup>a</sup>, Elena E. Giorgi<sup>b</sup>, Amit  
5 Kumar<sup>a</sup>, Erin McGuire<sup>a</sup>, Barton F. Haynes<sup>a,c</sup>, M. Anthony Moody<sup>a,d</sup>, Peter F. Wright<sup>e</sup>,  
6 Genevieve G. Fouda<sup>a,d</sup>, Feng Gao<sup>c</sup>, and Sallie R. Permar<sup>a,d,#</sup>

7  
8 <sup>a</sup> Duke Human Vaccine Institute, Duke University Medical Center, Durham, NC, USA

9 <sup>b</sup> Los Alamos National Laboratory, Los Alamos, NM, USA

10 <sup>c</sup> Department of Medicine, Duke University Medical Center, Durham, NC, USA

11 <sup>d</sup> Department of Pediatrics, Duke University Medical Center, Durham, NC, USA

12 <sup>e</sup> Department of Pediatrics, Dartmouth-Hitchcock Medical Center, Lebanon, NH, USA

13 <sup>#</sup> Corresponding author at: Duke Human Vaccine Institute, 2 Genome Court, Durham,  
14 NC, 27710, USA. Email: [sallie.permar@duke.edu](mailto:sallie.permar@duke.edu) (S.R. Permar)

15 Email addresses: [ehompe@gmail.com](mailto:ehompe@gmail.com) (E.D. Hompe), [jesse.mangold@duke.edu](mailto:jesse.mangold@duke.edu) (J.F.

16 Mangold), [joshua.eudailey@duke.edu](mailto:joshua.eudailey@duke.edu) (J.A. Eudailey), [egiorgi@lanl.gov](mailto:egiorgi@lanl.gov) (E.E. Giorgi),

17 [amit.kumar2@duke.edu](mailto:amit.kumar2@duke.edu) (A. Kumar), [erinmcguire09@gmail.com](mailto:erinmcguire09@gmail.com) (E. McGuire),

18 [barton.haynes@duke.edu](mailto:barton.haynes@duke.edu) (B.F. Haynes), [tony.moody@duke.edu](mailto:tony.moody@duke.edu) (M.A. Moody),

19 [peter.f.wright@hitchcock.org](mailto:peter.f.wright@hitchcock.org) (P.F. Wright), [genevieve.fouda@duke.edu](mailto:genevieve.fouda@duke.edu) (G.G. Fouda),

20 [feng.gao@duke.edu](mailto:feng.gao@duke.edu) (F. Gao), [sallie.permar@duke.edu](mailto:sallie.permar@duke.edu) (S.R. Permar)

21 \* These authors contributed equally to this manuscript.

22

23

24 **Abstract**

25 Preventive strategies beyond ART will be required to end the pediatric HIV  
26 epidemic. A maternal vaccine capable of boosting neutralizing antibody (nAb)  
27 responses against circulating viruses in HIV-infected pregnant women could effectively  
28 decrease mother-to-child transmission of HIV. However, it is not known if an HIV  
29 envelope (Env) vaccine administered to infected pregnant women can enhance  
30 autologous virus neutralization.

31 Here, we assessed autologous virus nAb responses in maternal plasma samples  
32 obtained from AIDS Vaccine Evaluation Group (AVEG) Protocols 104 and 102,  
33 historical Phase I safety and immunogenicity trials of recombinant HIV Env subunit  
34 vaccines in HIV-infected pregnant women (NCT00001041). AVEG 104 participants  
35 were randomized to receive 300 µg Env subunit MN recombinant gp120 with alum  
36 adjuvant or alum alone. AVEG 102 participants were randomized to receive 640 µg Env  
37 subunit recombinant gp160 or placebo. HIV Env-specific maternal plasma binding and  
38 neutralizing responses were characterized before and after vaccination in 15 AVEG 104  
39 (n=10 vaccinee, n=5 placebo) and 2 AVEG 102 (n=1 vaccinee, n=1 placebo)  
40 participants. Single genome amplification (SGA) was used to obtain HIV *env* gene  
41 sequences from autologous viruses for pseudovirus production in pre- and post-  
42 vaccination plasma of HIV-infected pregnant vaccinees (n=6 gp120, n=1 gp160) and  
43 placebo recipients (n=3).

44 We detected an increase in MN gp120-specific IgG binding in the vaccinee group  
45 between the first immunization visit and the last visit at delivery (p=0.027, 2-sided  
46 Wilcoxon test). However, no difference was observed in the neutralization potency of

47 maternal plasma collected at delivery against autologous viruses isolated from early or  
48 late pregnancy. Thus, maternal vaccination with gp120/160 did not boost maternal  
49 autologous virus nAb responses. Immunization strategies capable of more potent B cell  
50 stimulation will likely be required to effectively boost autologous virus nAb responses in  
51 pregnant women and synergize with ART to further reduce infant HIV infections.

52

### 53 **Key Words**

54 Human immunodeficiency virus; mother-to-child transmission; maternal vaccination; HIV  
55 envelope; autologous virus neutralization

56

### 57 **Abbreviations**

58 Neutralizing antibody (nAb), envelope protein (Env), AIDS Vaccine Evaluation Group  
59 (AVEG), single genome amplification (SGA), envelope gene (*env*), mother-to-child  
60 transmission (MTCT), antiretroviral therapy (ART), variable loops 1 and 2 (V1V2),  
61 variable loop 3 (V3), membrane-proximal external region (MPER), Women and Infants  
62 Transmission Study (WITS), monoclonal antibodies (mAbs), CD4 binding site (CD4bs),  
63 recombinant HIV Env gp120 (rgp120), recombinant HIV (rgp160), binding antibody  
64 multiplex assay (BAMA), HIV immunoglobulin (HIVIG), mean fluorescent intensity (MFI),  
65 zidovudine (ZDV), Toll-like receptor (TLR), antibody dependent cell cytotoxicity (ADCC)

66

### 67 **Highlights**

- 68 • Prior maternal HIV Env vaccine trial did not assess autologous virus  
69 neutralization

- 70 • Circulating viruses isolated from mothers were tested against autologous plasma
- 71 • Maternal vaccination with HIV Env gp120/160 increased MN gp120-specific IgG
- 72 binding
- 73 • Maternal HIV Env vaccine regimen did not boost autologous virus neutralization
- 74 • More potent B cell stimulation will be required to elicit autologous nAb responses

75

## 76 **Introduction**

77

78 Despite widespread efforts to eliminate pediatric HIV infections, mother-to-child  
79 transmission (MTCT) of HIV continues to pose a significant global health challenge.

80 With the wide availability of antiretroviral therapy (ART) for HIV-infected women during  
81 pregnancy and breastfeeding, as well as for infant prophylaxis, the rate of new HIV  
82 infections among infants have decreased by 41% from 2010 to 2018 [1]. Although  
83 approximately 82% of HIV-infected pregnant women across the globe had access to  
84 ART in 2018, there were still 160,000 newly acquired pediatric HIV infections in the  
85 same year [1]. Some of the factors contributing to these new infections are the  
86 emergence of drug-resistant HIV strains, late maternal diagnosis or presentation for  
87 prenatal care, acute infection during pregnancy or breastfeeding, and poor  
88 implementation of ART in resource-limited areas.

89 In the absence of ART prophylaxis during pregnancy, the MTCT transmission  
90 rate is 30-40% and can occur antepartum (*in utero*), intrapartum (during labor and  
91 delivery), or postpartum (during breastfeeding) [2]. Even with optimal implementation of  
92 antenatal triple-drug ART, breakthrough transmission can occur, with rates as high as

93 5% [3, 4]. In addition, recent studies have demonstrated that while ART can effectively  
94 reduce the rate of MTCT, this reduction comes at the expense of a notable increase in  
95 preterm birth and neonatal death, particularly for protease inhibitor-based regimens [4-  
96 6]. Moreover, recent reports of increased prevalence of neural tube defects in newborns  
97 associated with maternal exposure to dolutegravir-based ART at conception have  
98 raised concerns regarding toxicity of ART and highlight an urgent need for additional  
99 preventative approaches [7-10]. Thus, due to issues of ART access, adherence,  
100 incomplete efficacy, and toxicity, further strategies will be required to eliminate MTCT.

101       Prior studies have implicated HIV Env-specific antibody responses as being  
102 potentially protective against HIV-1 transmission. In fact, the partially effective RV144  
103 vaccine trial of a recombinant gp120 vaccine indicated that vaccine-elicited IgG against  
104 variable loops 1 and 2 (V1V2) of gp120 was associated with decreased risk of HIV-1  
105 heterosexual transmission [11-14]. While this particular epitope has not been implicated  
106 in protection against MTCT, maternal antibodies against both the variable loop 3 (V3) of  
107 Env gp120 and the gp41 membrane-proximal external region (MPER) have been shown  
108 to correlate with reduced risk of MTCT [15, 16]. In addition, studies have demonstrated  
109 that heterologous virus HIV-neutralizing antibodies are found more frequently or in  
110 higher titers in non-transmitting compared to transmitting mothers [17, 18]. However,  
111 there is conflicting data regarding the role of maternal antibodies in preventing vertical  
112 transmission, as other studies have failed to confirm this association between maternal  
113 Env-specific neutralizing antibodies and decreased transmission risk [2, 19]. Moreover,  
114 some studies have observed the opposite trend, reporting that transmitting women had  
115 higher concentrations of maternal IgG against the Env V3 region compared to non-

116 transmitting women [20]. Clearly, further investigation is needed to elucidate the  
117 relationship between maternal antibody responses and risk of transmission to the infant.

118 We previously investigated immune correlates of vertical HIV-1 transmission in  
119 pregnant, in a large cohort of HIV clade B-infected US women from the Women and  
120 Infants Transmission Study (WITS) [21]. The results demonstrated that maternal IgG  
121 against V3, plasma neutralization of clade-matched tier 1 but not tier 2 HIV-1 variants,  
122 and the potency of the maternal plasma to block CD4 from binding to clade B HIV-1  
123 Envs predicted reduced risk of MTCT. Interestingly, these responses were co-linear in  
124 their prediction of MTCT risk, suggesting that they may be surrogate measures for the  
125 same underlying mechanism of virus neutralization that influences infant transmission.  
126 In fact, isolated V3-specific monoclonal antibodies (mAbs) that could neutralize tier 1,  
127 but not tier 2 heterologous viruses, were able to neutralize most autologous viruses  
128 isolated from maternal plasma [21]. Moreover, it has also been demonstrated that  
129 autologous V3 and CD4 binding site (CD4bs) mAbs isolated from chronically HIV-1-  
130 infected individuals can neutralize autologous, but not heterologous, tier 2 viruses [22].  
131 This indicates that non-broadly neutralizing antibodies can potently neutralize  
132 autologous circulating viruses, which is especially pertinent in the unique setting of  
133 MTCT, as maternal circulating viruses are the source of the vertically transmitted virus.  
134 In recent study, we also characterized vertically transmitted and non-transmitted  
135 maternal HIV Env variants in 16 mother-infant transmitting pairs from the WITS cohort,  
136 and found that, compared to maternal non-transmitted variants, the infant transmitted  
137 virus variants were significantly more neutralization-resistant to paired maternal plasma  
138 [23]. This finding suggests that autologous neutralizing antibody sensitivity may define

139 infant transmitted/founder variants, and, therefore, boosting autologous neutralizing  
140 antibody responses in HIV infected pregnant women could be a viable immune strategy  
141 to decrease vertical transmission.

142         Yet, it is unknown whether vaccination of HIV-infected pregnant women with an  
143 Env vaccine would even temporarily enhance autologous virus neutralizing antibody  
144 responses. In two historic vaccine trials completed in 1993-1995 by the AIDS Vaccine  
145 Evaluation Group (AVEG) Protocols 104 and 102, safety and immunogenicity of  
146 recombinant HIV Env gp120 and gp160 (rgp120, rgp160) respectively as antigens, were  
147 tested in HIV-infected pregnant women [24]. While the Env vaccine was safe and well  
148 tolerated, there was limited enhancement of maternal immune responses against  
149 heterologous viruses in vaccinees compared to placebo recipients [24]. Importantly,  
150 because of the immunological phenomenon of original antigenic sin, it is possible that  
151 immunization with an heterologous Env vaccine may recruit memory immune cells in  
152 HIV-infected pregnant women, leading to an enhancement of their autologous virus  
153 neutralizing immune responses. In the setting of MTCT, evocation of original antigenic  
154 sin for enhancement of autologous virus neutralization could be an effective strategy to  
155 impede perinatal virus transmission. Nevertheless, whether maternal rgp120/160  
156 vaccination enhanced neutralizing antibody responses against the maternal autologous  
157 circulating viruses remained unknown.

158         In this study, we sought to assess whether immunization of HIV-infected  
159 pregnant women with an alum-adjuvanted recombinant Env vaccine elicited maternal  
160 antibody responses that improved autologous virus neutralization responses.  
161 Additionally, we characterized representative maternal virus population diversity from

162 pre- and post-immunization time points in 7 vaccinees and 3 placebo recipients and  
163 assessed the antibody binding kinetics and ability of maternal plasma to neutralize  
164 these autologous viruses. This work offers novel insights into the feasibility of enhancing  
165 maternal autologous virus neutralization and antibody responses through maternal HIV  
166 Env vaccination as an adjunctive strategy to protect the infant against HIV-1 acquisition.

167

## 168 **Materials & Methods**

169

### 170 *Study Subjects*

171 Maternal plasma samples were obtained from the AIDS Vaccine Evaluation  
172 Group (AVEG) Protocols 104 and 102, a Phase I study of safety and immunogenicity of  
173 MN rgp120 and rgp160 HIV-1 vaccines in HIV-infected pregnant women  
174 (ClinicalTrials.gov; NCT00001041). In the AVEG 104 Protocol, 26 HIV-infected pregnant  
175 women with CD4+ T cell counts  $>400/\text{mm}^3$  were enrolled in the second trimester of  
176 healthy pregnancy and randomized to receive either 300  $\mu\text{g}$  of MN rgp120 (Genentech)  
177 with alum (n=17) as an adjuvant or alum with diluent (n=9) between 16 and 24 weeks of  
178 gestation [24]. Booster immunizations were administered monthly, until delivery, for a  
179 minimum of 3 vaccine doses and a maximum of 5 vaccine doses (Figure 1). Similarly, 2  
180 HIV-infected pregnant women were enrolled with the same criteria in the AVEG 102  
181 Protocol, though instead these women received either 640  $\mu\text{g}$  of rgp160 (VaxSyn,  
182 MicroGeneSys) (n=1) or a placebo (n=1). Maternal plasma samples from multiple visit  
183 time points were available for 15 AVEG 104 participants (n=10 MN rgp120 vaccine, n=5



184 alum placebo) and 2 AVEG 102 participants (n=1 rgp160 vaccine, n=1 placebo) (Table  
185 1).

186

### 187 *Ethics statement*

188 Original study protocols AVEG 102 and 104 were approved by local institutional  
189 review boards at the seven sites involved in the original study [24]. Informed consent  
190 was obtained from all women, and also from their partners when available. In the  
191 present study, the use of de-identified maternal samples from the AVEG 102 and 104  
192 protocol cohorts was deemed exempt by the Duke University Institutional Review  
193 Board. Moreover, in this study, individual patient identification (PTID) numbers are  
194 instead represented by PubID numbers.

195

### 196 *Viral RNA extraction and cDNA synthesis*

197 Viral RNA was extracted from the plasma sample from each mother with a  
198 QIAamp Viral RNA Mini Kit (Qiagen) and subjected to reverse transcription and cDNA  
199 synthesis using 1X reaction buffer, 0.5 mM of each deoxynucleoside triphosphate  
200 (dNTP), 5 mM DTT, 2 U/mL RNaseOUT, 10 U/mL of SuperScript III reverse  
201 transcription mix (Invitrogen), and 0.25 mM antisense primer 1.R3.B3R (5'-  
202 ACTACTTGAAGCACTCAAGGCA AGCTTTATTG-3'), located in the HIV-1 *nef* open  
203 reading frame.

204

### 205 *Single genome amplification*

206 Full-length envelope (*env*) genes were then amplified by nested PCR from  
207 diluted viral cDNA, as previously described [23, 25]. Briefly, cDNA was endpoint-diluted  
208 in 96-well plates (Applied Biosystems) with the goal of <30% positive amplification, in  
209 order to maximize the likelihood of obtaining a single genome. First round PCR was  
210 carried out with 1X buffer, 2 mM MgSO<sub>4</sub>, 0.2 mM of each dNTP, 0.2μM of each primer,  
211 and 0.025 U/μl Platinum Taq High Fidelity polymerase (Invitrogen) in a 20μl reaction.  
212 For the first round of PCR amplification, primer pairs were Env 5'ex (5'-  
213 TAGAGCCCTGGAAGCATCCAGGAAG-3') and Env 3'ex (5'-  
214 TTGCTACTTGTGATTGCTCCATGT-3'), Env 5'ex and 2.R3.B6R (5'-  
215 TGAAGCACTCAAGG CAAGCTTTATTGAGGC-3'), or 07For7 (5'-  
216 AAATTAYAAAAATTCAAATTTTCGGGTT TATTACAG-3') and 2.R3.B6R. The  
217 following PCR conditions were used for Round 1 amplification: 1 cycle of 94°C for 2  
218 minutes, 35 cycles of 94°C for 15 seconds, 55°C for 30 seconds, and 68°C for 3  
219 minutes and 30 seconds for the Env 5'ex/3'ex primers (4min and 30s for Env  
220 5'ex/2.R3.B6R, 5min and 30s for 07For7/2.R3.B6R), followed by a final cycle of 68°C for  
221 10 minutes. Then, a second round of PCR amplification was carried out with 2μl of the  
222 first round product as template, 0.2μM of each primer, and the same PCR mixture as in  
223 round one, in a 50μl reaction. Primer pairs for second round PCR were Env 5'in (5'-  
224 TTAGGCATCTCCTATGGCAGGAAGAAG-3') and Env 3'in (5'-  
225 GTCTCGAGATACTGCTCCCACCC-3'), Env 5'in and 2.R3.B6R (5'-TGAA  
226 GCACTCAAGG CAAGCTTTATTGAGGC-3'), or Low2c (5'-  
227 TGAGGCTTAAGCAGTGGGT TCC-3') and VIF1 (5'-  
228 GGGTTTATTACAGGGACAGCAGAG-3'). Round 2 conditions were one cycle of 94°C

229 for 2 minutes, 35 cycles of 94°C for 15 seconds, 55°C for 30 seconds, and 68°C for 3  
230 minutes and 30 seconds for the Env 5'in/3'in primers (4min and 30s for Env  
231 5'in/2.R3.B6R, 5min and 30s for Low2c/VIF1), followed by 1 cycle of 68°C for 10  
232 minutes. Round 2 PCR amplicons were visualized using precast 1% agarose E-gels  
233 (Invitrogen), purified with the AMPure XP magnetic bead purification system  
234 (Agencourt), and sequenced for the HIV *env* gene by Sanger sequencing (Table 1).

235

### 236 *HIV env gene genetic analysis*

237 Sequences were assembled using the Sequencher program (Gene Codes) and  
238 manually edited. Chromatograms were examined for sites of ambiguity, or double peaks  
239 per base read, and sequences containing multiple base peaks at a single position were  
240 marked as such and not studied further. Envelope sequences were aligned using the  
241 Gene Cutter tool available in the HIV Sequence Database of the Los Alamos National  
242 Laboratory (LANL) website  
243 ([http://www.hiv.lanl.gov/content/sequence/GENE\\_CUTTER/cutter.html](http://www.hiv.lanl.gov/content/sequence/GENE_CUTTER/cutter.html)) and manually  
244 edited further in Seaview (Version 4) [26]. Phylogenetic trees were constructed using  
245 Seaview and highlighter plots were created using the Highlighter tool on the LANL  
246 website ([https://www.hiv.lanl.gov/content/sequence/HIGHLIGHT/highlighter\\_top.html](https://www.hiv.lanl.gov/content/sequence/HIGHLIGHT/highlighter_top.html)).

247

### 248 *Pseudovirus production and infectivity analysis*

249 Using a previously described sequence selection algorithm [23], approximately 8-  
250 10 maternal Env variants were selected from the pre-immunization time point (Visit 1)  
251 and post-immunization time point (Visit 9) for Env pseudovirus production. Variants

252 representing major clusters of the phylogenetic trees were selected to represent the full  
253 range of *env* genetic diversity in maternal plasma. To produce functional pseudoviruses  
254 from the HIV-1 *env* sequences, CMV promoter was added to the *env* genes by  
255 overlapping PCR as previously described [27] and the products were co-transfected  
256 with a backbone plasmid lacking the *env* gene (SG3Δ*env*) in 293T cells (American  
257 Tissue Culture Collection, Manassas, Virginia). 293T cells (approx.  $4.5 \times 10^6$ ) were  
258 seeded in a T-75 flask (Corning, Corning, NY) containing growth media (GM)  
259 (Dulbecco's modified Eagle's medium (DMEM)-10% fetal bovine serum (FBS)-1%  
260 penicillin-streptomycin containing HEPES, ThermoFisher, Waltham, MA) and incubated  
261 overnight at 37°C and 8% CO<sub>2</sub>. 4μg of Env DNA containing CMV promoter was  
262 combined with 4μg of SG3Δ*env* backbone and FuGene 6 transfection reagent (Roche  
263 Diagnostics) was added as per manufacturer's instructions. The mixture was then  
264 added to the T-75 flask and it was incubated at 37°C for 48 hours. Supernatant  
265 containing pseudovirus was harvested and stored at -80°C with a final concentration of  
266 20% FBS. To measure the infectivity of the pseudoviruses, 20μl of pseudovirus was  
267 added in duplicate to a 96-well flat bottom plate and then 100μl TZM-bl cells (catalog  
268 no. 8129; NIH AIDS Reagent Program; from John Kappes and Xiaoyun Wu) were  
269 added (10,000 cells/100μl GM with 10μg/ml of DEAE-dextran). After a 48-hour  
270 incubation at 37°C and 8% CO<sub>2</sub>, 100μl of culture medium was removed and 100μl of  
271 Bright-Glo luciferase reagent (Promega) was added. The mixture was incubated for 2  
272 minutes at 25°C, 100μl was subsequently transferred to a 96-well black plate, and  
273 luminescence was measured immediately on a Victor X3 multilabel plate reader  
274 (PerkinElmer).

275

276 *TZM-bl neutralization assay*

277 Neutralization of autologous pseudoviruses by maternal plasma was measured  
278 using a luciferase (Luc) reporter gene assay in TZM-bl cells (catalog no. 8129; NIH  
279 AIDS Reagent Program; from John Kappes and Xiaoyun Wu), as previously described  
280 [28]. Before performing the assay, plasma was heat inactivated by incubating for 30  
281 minutes at 56°C. Plasma samples were added at a starting dilution of 1:20 and diluted  
282 threefold serially. Then, the plasma samples were incubated with virus for 1 hour at  
283 37°C. TZM-bl cells were added, and the mixture was incubated for 48 hours.  
284 Luminescence was then measured using the Bright-Glo luciferase reagent and Victor X3  
285 luminometer and luminescence values used to calculate the ID<sub>50</sub>, or dilution at which  
286 relative luminescence units (RLU) were reduced by 50% compared to virus control  
287 wells. VRC01 was used as a positive control in each experiment and murine leukemia  
288 virus (SVA.MLV) served as a negative control for the assay [29].

289

290 *Binding antibody multiplex assay (BAMA)*

291 HIV-1 Env-specific IgG responses in maternal plasma against a panel of HIV-1  
292 antigens were detected using a customized BAMA, as previously described [30]. HIV-1  
293 antigens were covalently coupled to carboxylated fluorescent beads (Bio-Rad  
294 Laboratories) and IgG binding to the bead-coupled antigens was measured. The  
295 antigen panel for IgG BAMA assays included biotinylated linear V3 loop peptide V3.B  
296 (Bio V3 B) and the following 4 proteins: MNgp120, Gp70 B.MN V3, Gp70  
297 B.CaseA\_V1V2, and HIV-1 MN recombinant gp41 (REC MN gp41, ImmunoDiagnostics)

298 (Table S1). The antigen-coupled beads were incubated with diluted plasma samples  
299 (1:100 for MNgp120, Gp70 B.MN V3, Gp70 B.CaseA\_V1V2; 1:2000 for V3.B and REC  
300 MN gp41) for 30 minutes at room temperature (20-25°C). HIV Env-specific IgG was  
301 then detected with phycoerythrin (PE)-conjugated mouse anti-human IgG (Southern  
302 Biotech, Birmingham, AL) at 2 µg/ml. Beads were washed, resuspended, and acquired  
303 on a Bio-Plex 200 instrument (Bio-Rad Laboratories). Blank beads were used to  
304 account for non-specific binding and HIV immunoglobulin (HIVIG) was used as a  
305 positive control for all assays. The magnitude of antibody binding to the panel of HIV-1  
306 Env antigens was measured as mean fluorescent intensity (MFI). MFI values for  
307 conformational antigens containing gp70 were background-adjusted by subtracting the  
308 MFI values of gp70 MuIV. All MFI values were background-adjusted by subtracting the  
309 MFI values of coupled beads without sample. A positive HIV Env-specific antibody  
310 response was considered to be an MFI > 100. The criteria for reporting sample MFI  
311 values included coefficient of variation ≤20% with a bead count ≥100 for each sample.  
312 All assays tracked the 50% effective concentration and maximum MFI of the positive  
313 control HIVIG and protein standards CH58, B12, and 7B2 by Levey-Jennings charts to  
314 ensure data consistency.

315

### 316 *Statistics*

317 We tested for differences in antibody binding and neutralization responses  
318 between placebo and vaccinees using 2-sided Wilcoxon tests comparing the values at  
319 the first visit to those at the last visit. Because time intervals between visits differed

320 across study subjects, we also tested the change per day between visits. All statistical  
321 analyses and graphs were produced using R [31].

322

## 323 **Results**

324

### 325 ***Env-specific antibody binding responses in vaccinees compared to placebo***

#### 326 ***recipients***

327

328 The magnitude of HIV Env epitope-specific IgG responses prior to and following  
329 Env vaccination in HIV-1 infected vaccinated women and placebo recipients was  
330 assessed by BAMA. We measured maternal vaccine-elicited responses against clade B  
331 MN gp120 protein (Env matched to the vaccine immunogen), gp70 V1V2 protein, and a  
332 linear V3 peptide. When comparing the change in clade B MN gp120-specific binding  
333 responses between the first and last visit among study participants, all placebo  
334 recipients (n=6) did not show increase in binding, whereas 8 out of 11 vaccinees  
335 showed increase in binding over time. Statistically, the overall increase in binding to MN  
336 gp120 was significantly higher in vaccinees compared to placebo recipients (p=0.027 by  
337 Wilcoxon test, Figure 2). To account for differences in the timing of visits for each  
338 mother, we calculated the change in MN gp120-specific binding response per day  
339 between the first (Visit 1, 4) and last visit (Visit 9). Per day increase in clade B MN  
340 gp120-specific binding responses between the first and last visit was statistically  
341 significantly higher in vaccinees as compared to placebo recipients (p=0.015 by  
342 Wilcoxon test, Figure S1). We observed more than 3-fold increase in antibody binding

343 responses against MN gp120 in 1/11, 2/11, and 3/11 vaccinees against antigens MN  
344 gp120, linear V3.B, and gp70 V1V2, respectively. No change in change in antibody  
345 binding responses was observed in placebo recipients except in one against gp70 V1V2  
346 (Figure 3, Figure S2).

347

348 ***Autologous virus neutralizing antibody responses in vaccinees compared to***  
349 ***placebo recipients***

350

351 To determine if gp120 or gp160 vaccination enhanced functional, virus-specific  
352 neutralizing antibody responses, we assessed the ability of maternal plasma to  
353 neutralize autologous virus variants isolated from plasma collected in early pregnancy  
354 before vaccination and late pregnancy after vaccine boosting. There was no difference  
355 between vaccinees and placebo recipients in the ability of maternal plasma collected at  
356 delivery to neutralize autologous virus populations isolated from early and late  
357 pregnancy visits (Figure 4A-B, Figure S3). Moreover, the difference in the ability of  
358 maternal plasma collected at the first visit (Visit 1,4) versus last visit (Visit 9) to  
359 neutralize early pregnancy plasma viruses (Visit 1, 4) was comparable between  
360 vaccinees and placebo recipients (Figure 4C-D).

361 Additionally, we tested the ability of maternal plasma collected from the pre-  
362 vaccination visit (Visit 1), the booster visits (Visits 3, 4, 5, & 6), and the post-vaccination  
363 visits (Visits 7 & 9) to neutralize autologous virus populations from the pre-vaccination  
364 or early pregnancy visit (Visit 1, 4) (Figure 5). Interestingly, there appears to be a boost  
365 over time in neutralization potency against autologous virus populations isolated from



366 the pre-vaccination visit in the gp160 vaccinee as compared to the corresponding  
367 placebo recipient, yet this trend was only observed in the one vaccinee from which  
368 samples were available for testing. Taken together, there was no significant change in  
369 autologous virus neutralization potency over time for Env vaccinees as compared to  
370 placebo recipients.

371

372 ***Plasma HIV env gene sequence diversity in vaccinees compared to placebo***  
373 ***recipients***

374

375 Through single genome amplification, we obtained 282 total HIV *env* gene  
376 sequences from vaccinees (n=7) and 118 total HIV *env* gene sequences from placebo  
377 recipients (n=3) (Table 1). To characterize viral evolution between visits in study  
378 participants, we measured viral diversity through the mean pairwise Hamming distance,  
379 which was calculated as the number of mutations between all pairs of *env* sequences  
380 isolated from one sample divided by the total number of bases in the alignment. The  
381 changes in viral diversity between visits observed in the placebo recipients were not  
382 significantly different from those observed in the vaccinees (Figure 6). Yet, in a per day  
383 analysis of mean Hamming distance since the pre-vaccine visit, we observed a trend in  
384 which vaccinees consistently demonstrated lower HIV *env* gene sequence diversity than  
385 placebo recipients (Figure S4). However, this trend did not reach significance,  
386 potentially due to limited statistical power given the small sample size.

387

388 **Discussion**

389           Unlike other modes of HIV transmission, MTCT is a unique setting since it occurs  
390 in the presence of pre-existing humoral immunity. Maternal IgG antibodies that are  
391 passively acquired by the fetus through transplacental transfer during pregnancy and by  
392 the infant through breastfeeding are known to provide critical protection against  
393 perinatal pathogens for neonates during the first few months of life [32]. Despite the  
394 potential source of transmitted virus in a mother-infant pair being confined to the  
395 maternal autologous circulating virus pool, our limited understanding of how maternal  
396 antibody responses that coevolved with circulating virus populations impact vertical HIV  
397 transmission remains a major barrier in developing a maternal immunization strategy for  
398 the prevention of MTCT. Yet, there are reasons to believe that enhancing the ability of  
399 maternal plasma to neutralize co-circulating viruses may impede vertical virus  
400 transmission. Thus, augmentation of maternal autologous virus neutralizing antibody  
401 responses through vaccination during pregnancy is a potentially viable strategy to  
402 further reduce the rate of MTCT in synergy with ART.

403           In this study, we investigated the induction of neutralizing antibodies against  
404 autologous circulating viruses in the AVEG 102 and 104 maternal HIV Env vaccine trials  
405 (1993-1995), which assessed the safety and immunogenicity of alum-adjuvanted gp120  
406 and gp160 subunit vaccines in HIV-infected, pregnant women. Importantly, while the  
407 Env vaccines were reported to be safe and immunogenic, the ability of the vaccines to  
408 raise neutralizing responses against maternal circulating autologous viruses was not  
409 assessed [24]. With the development of novel techniques to isolate and analyze single  
410 HIV variants from plasma, as well as more sensitive, bead-based binding antibody  
411 detection, we are now better equipped to answer this important question. Another

412 limitation to the present study is incomplete information from the original study related to  
413 which subset of participants may have received antiretroviral therapy, as  
414 recommendations for clinical management of HIV-infected pregnant women were  
415 updated during the study following the first recognition that zidovudine was effective in  
416 decreasing the risk of MTCT of HIV [33]. Additionally, sample quality and restricted  
417 availability of time points limited the successful isolation of sufficient number of single  
418 genome amplicons from each participant for larger analyses. While the small sample  
419 size of 11 vaccinees and 6 placebo is a caveat to this study, these cohorts of HIV-  
420 infected pregnant women enrolled in a Phase I HIV Env subunit vaccine clinical trial  
421 represented a unique opportunity to understand the ability of HIV Env vaccination to  
422 enhance neutralizing antibody responses in the setting of MTCT.

423         Although enhanced autologous virus neutralization was not observed in the  
424 AVEG 102 and 104 study cohorts, our work offers key insight in that it suggests more  
425 potent B cell stimulation must be achieved for an HIV Env vaccination to be effective in  
426 boosting autologous neutralizing antibody responses in pregnancy. There are valuable  
427 lessons to be gained and key opportunities for improvement in trial design based on our  
428 analysis of this first Phase I trial of HIV Env subunit recombinant gp120 and gp160  
429 protein vaccines adjuvanted with alum in HIV-infected, pregnant women. While the first  
430 formal recognition that zidovudine (ZDV) was effective in reducing the risk of MTCT  
431 occurred during the AVEG 102 and 104 trial periods [33], next-generation maternal HIV  
432 Env vaccination strategies should be developed within the contemporary context of  
433 widespread availability of ART for pregnant women. Consequently, studies or trials of  
434 future maternal vaccine regimens aimed at preventing vertical transmission of HIV

435 should model the conditions of antiretroviral therapy and viral suppression during  
436 pregnancy.

437         Though the majority of vaccines currently licensed for human use in the United  
438 States are formulated with an aluminum-based adjuvant, alternative adjuvant selection  
439 may play a critical role in the elicitation of protective humoral responses against HIV  
440 transmission [34, 35]. In a systematic comparison of the ability of adjuvant formulations,  
441 including Toll-like receptor (TLR) agonists, to induce antibody binding, neutralizing, and  
442 ADCC responses against transmitted/founder HIV-1 envelope gp140 (B.63521) in  
443 rhesus macaques, Moody et al. demonstrated that combination of a TLR7/8 agonist with  
444 a TLR9 agonist in a squalene-based oil-in-water emulsion resulted in enhanced HIV  
445 Env-specific antibody responses [36]. These potent TLR-based adjuvants may be  
446 exploited to synergize with highly antigenic HIV immunogens to induce more potent and  
447 durable protective antibody titers. During the 2009 influenza A (H1N1) pandemic, an  
448 H1N1 vaccine in combination with a novel squalene-based AS03 adjuvant was safely  
449 used among pregnant women in Norway and resulted in reduced risk of both influenza  
450 diagnosis and fetal death [37]. Thus, the demonstrated safety profile of AS03 adjuvant  
451 among pregnant women has opened the door for implementation of novel adjuvants  
452 beyond alum in pregnancy.

453         Moreover, the nature of vertical transmission of HIV necessitates a vaccination  
454 strategy that can mount a protective immune response specific to the autologous  
455 circulating virus pool of each HIV-infected mother. Thus, the choice of vaccine  
456 immunogen must reflect the broad diversity of HIV strains circulating today, specifically  
457 clade C and B virus subtypes prevalent in Sub-Saharan Africa and the United States

458 and Europe, respectively. One potential approach to overcome this barrier is to employ  
459 a multi-clade (B/C) HIV Env immunogen that would leverage the immunological  
460 phenomenon of original antigenic sin to provoke an anamnestic response against  
461 maternal autologous circulating viruses.

462         Additionally, future studies may explore the potentially protective role of antibody-  
463 mediated effector functions beyond neutralization in reducing the risk of MTCT of HIV.  
464 Notably, a previous study by Overbaugh et al. suggested that HIV Env-specific IgG-  
465 mediated antibody dependent cell cytotoxicity (ADCC) activity in breastmilk correlates  
466 with reduced risk of postnatal vertical transmission [38]. Moreover, we have previously  
467 demonstrated that passive infusion with a cocktail of non-neutralizing antibodies  
468 provided partial protection against postnatal SHIV acquisition in an infant non-human  
469 primate oral challenge model [39]. Further investigation into the potentially protective  
470 roles of other Fc-mediated effector functions including antibody dependent cell  
471 phagocytosis (ADCP) and complement activation activity in the setting of MTCT of HIV  
472 is warranted. Perhaps elicitation of the full breadth of polyfunctional antiviral activity of  
473 the humoral immune response, not only autologous neutralization response, will be the  
474 critical target of maternal HIV vaccine design to eliminate MTCT.

475

## 476 **Conclusion**

477         In this study, we assessed the autologous virus neutralization responses of  
478 maternal plasma collected at delivery against circulating viruses isolated from early and  
479 late pregnancy in HIV-infected women vaccinated with an HIV Env subunit recombinant  
480 gp120/160 adjuvanted with alum from historical AVEG 102 and 104 Phase I trials. We

481 found that vaccination of HIV-infected pregnant women with recombinant MN gp120 or  
482 gp160 adjuvanted with alum boosted HIV Env-specific antibody binding responses  
483 between the first and last visit against clade B MN.3 gp120, the original vaccine antigen,  
484 compared to placebo recipients. However, vaccination failed to augment the ability of  
485 maternal plasma collected at delivery to neutralize clade B MN.3 virus, a tier 1  
486 heterologous virus, between the first and last visit. Maternal HIV Env vaccination did not  
487 enhance the ability of maternal plasma collected at delivery to neutralize autologous  
488 viruses isolated from early pregnancy. Moreover, vaccination had no evident impact on  
489 viral diversity. These findings indicate that further optimization in choice of vaccine  
490 immunogen and adjuvant will be necessary to effectively augment autologous virus  
491 neutralization responses in HIV-infected pregnant women to synergize with ART and  
492 reduce MTCT of HIV.

493

#### 494 **Funding Statement**

495 This work was supported by National Institutes of Health grant [R01AI122909]  
496 awarded to SRP; Doris Duke Charitable Foundation Clinical Research Mentorship  
497 Program grant [2017046] awarded to SRP and EDH; HVTN grant UM1 AI068618; and  
498 the International Maternal Pediatric Adolescent AIDS Clinical Trials Network  
499 (IMPAACT). Overall support for IMPAACT was provided by the National Institute of  
500 Allergy and Infectious Diseases (NIAID) with co-funding from the Eunice Kennedy  
501 Shriver National Institute of Child Health and Human Development (NICHD) and the  
502 National Institute of Mental Health (NIMH), all components of the National Institutes of  
503 Health (NIH), under Award Numbers UM1AI068632 (IMPAACT LOC), UM1AI068616

504 (IMPAACT SDMC) and UM1AI106716 (IMPAACT LC), and by NICHD contract number  
505 HHSN275201800001I. The content is solely the responsibility of the authors and does  
506 not necessarily represent the official views of the NIH. The funding sources had no role  
507 in study design; collection, analysis, or interpretation of data; manuscript preparation;  
508 nor in the decision to submit the manuscript for publication.

509

### 510 **Declaration of Competing Interests**

511 The authors declare the following financial interests/personal relationships which  
512 may be considered as potential competing interests:

513 S.R.P. is a consultant for Merck, Sanofi, Moderna, and Pfizer CMV vaccine programs  
514 and has sponsored programs with Merck and Moderna for CMV vaccine development.

515 All other authors have no competing interests to declare.

516

### 517 **Author Contributions**

518 **Eliza D. Hompe:** Conceptualization, Data curation, Formal analysis, Funding  
519 acquisition, Investigation, Methodology, Writing – original draft, Writing – review &  
520 editing. **Jesse F. Mangold:** Data curation, Formal analysis, Visualization, Writing –  
521 original draft. **Joshua A. Eudailey:** Data curation, Formal analysis, Investigation,  
522 Writing – review & editing. **Elena E. Giorgi:** Formal analysis, Methodology, Software,  
523 Writing – review & editing. **Amit Kumar:** Investigation, Methodology, Writing – review &  
524 editing. **Erin McGuire:** Investigation. **Barton F. Haynes:** Writing – review & editing. **M.**  
525 **Anthony Moody:** Writing – review & editing. **Peter F. Wright:** Resources, Writing –  
526 review & editing. **Genevieve G. Fouda:** Resources, Writing – review & editing,

527 Supervision. **Feng Gao**: Resources, Writing – review & editing, Supervision. **Sallie R.**  
528 **Permar**: Conceptualization, Methodology, Resources, Writing – review & editing,  
529 Supervision, Project administration, Funding acquisition. All authors gave final approval  
530 of the manuscript to be submitted. All authors attest they meet the ICMJE criteria for  
531 authorship.

532

### 533 **Acknowledgements**

534 We thank the women who participated in the AIDS Vaccine Evaluation Group  
535 102 and 104 trials and the HIV Vaccine Trials Network for supporting identification and  
536 handling of the maternal plasma specimens to conduct the present study. We would  
537 also like to acknowledge Hanna Itell, Grace Li, and Maria Dennis for their assistance  
538 with BAMA assays.

539

540

541

542

543

544

545

546

547

548

549



550  
551  
552  
553  
554  
555  
556  
557  
558  
559  
560  
561  
562  
563  
564  
565  
566  
567  
568  
569  
570  
571  
572  
573  
574  
575  
576  
577  
578  
579  
580  
581  
582  
583  
584  
585  
586  
587  
588  
589  
590  
591  
592  
593  
594  
595

## References

- [1] UNAIDS. Global HIV & AIDS Statistics - 2019 Fact Sheet. UNAIDS. Geneva, Switzerland 2019.
- [2] Braibant M, Barin F. The role of neutralizing antibodies in prevention of HIV-1 infection: what can we learn from the mother-to-child transmission context? *Retrovirology*. 2013;10:103.
- [3] Kesho Bora Study Group. Triple antiretroviral compared with zidovudine and single-dose nevirapine prophylaxis during pregnancy and breastfeeding for prevention of mother-to-child transmission of HIV-1 (Kesho Bora study): a randomised controlled trial. *Lancet Infect Dis*. 2011;11:171-80.
- [4] Fowler MG, Qin M, Fiscus SA, Currier JS, Flynn PM, Chipato T, et al. Benefits and Risks of Antiretroviral Therapy for Perinatal HIV Prevention. *New Engl J Med*. 2016;375:1726-37.
- [5] Powis KM, Kitch D, Ogwu A, Hughes MD, Lockman S, Leidner J, et al. Increased Risk of Preterm Delivery Among HIV-Infected Women Randomized to Protease Versus Nucleoside Reverse Transcriptase Inhibitor-Based HAART During Pregnancy. *The Journal of Infectious Diseases*. 2011;204:506-14.
- [6] Fowler MG, Qin M, Fiscus SA, Currier JS, Flynn PM, Chipato T, et al. Benefits and Risks of Antiretroviral Therapy for Perinatal HIV Prevention. *N Engl J Med*. 2016;375:1726-37.
- [7] Zash R, Jacobson DL, Diseko M, et al. Comparative safety of antiretroviral treatment regimens in pregnancy. *JAMA Pediatrics*. 2017;171:e172222.
- [8] Zash R, Makhema J, Shapiro RL. Neural-Tube Defects with Dolutegravir Treatment from the Time of Conception. *N Engl J Med*. 2018;379:979-81.
- [9] Zash R, Holmes L, Diseko M, Jacobson DL, Brummel S, Mayondi G, et al. Neural-Tube Defects and Antiretroviral Treatment Regimens in Botswana. *N Engl J Med*. 2019;381:827-40.
- [10] Dugdale CM, Ciaranello AL, Bekker LG, Stern ME, Myer L, Wood R, et al. Risks and Benefits of Dolutegravir- and Efavirenz-Based Strategies for South African Women With HIV of Child-Bearing Potential: A Modeling Study. *Ann Intern Med*. 2019.
- [11] Rerks-Ngarm S, Pitisuttithum P, Nitayaphan S, Kaewkungwal J, Chiu J, Paris R, et al. Vaccination with ALVAC and AIDSVAX to Prevent HIV-1 Infection in Thailand. *New Engl J Med*. 2009;361:2209-20.
- [12] Corey L, Gilbert PB, Tomaras GD, Haynes BF, Pantaleo G, Fauci AS. Immune correlates of vaccine protection against HIV-1 acquisition. *Science Translational Medicine*. 2015;7:310rv7-rv7.
- [13] Haynes BF, Gilbert PB, McElrath MJ, Zolla-Pazner S, Tomaras GD, Alam SM, et al. Immune-Correlates Analysis of an HIV-1 Vaccine Efficacy Trial. *New Engl J Med*. 2012;366:1275-86.
- [14] Gottardo R, Bailer RT, Korber BT, Gnanakaran S, Phillips J, Shen X, et al. Plasma IgG to Linear Epitopes in the V2 and V3 Regions of HIV-1 gp120 Correlate with a Reduced Risk of Infection in the RV144 Vaccine Efficacy Trial. *PLOS ONE*. 2013;8:e75665.
- [15] Rossi P, Moschese V, Broliden PA, Fundaró C, Quinti I, Plebani A, et al. Presence of maternal antibodies to human immunodeficiency virus 1 envelope glycoprotein gp120 epitopes correlates with the uninfected status of children born to seropositive mothers. *Proceedings of the National Academy of Sciences*. 1989;86:8055-8.
- [16] Diomede L, Nyoka S, Pastori C, Scotti L, Zambon A, Sherman G, et al. Passively Transmitted gp41 Antibodies in Babies Born from HIV-1 Subtype C-Seropositive Women: Correlation between Fine Specificity and Protection. *J Virol*. 2012;86:4129-38.

- 596 [17] Scarlatti G, Albert J, Rossi P, Hodara V, Biraghi P, Muggiasca L, et al. Mother-to-child  
597 transmission of human immunodeficiency virus type 1: correlation with neutralizing antibodies  
598 against primary isolates. *J Infect Dis.* 1993;168:207-10.
- 599 [18] Bongertz V, Costa CI, Veloso VG, Grinsztejn B, Filho ECJ, Calvet G, et al. Neutralization  
600 Titres and Vertical HIV-1 Transmission. *Scand J Immunol.* 2002;56:642-4.
- 601 [19] Omenda MM, Milligan C, Odem-Davis K, Nduati R, Richardson BA, Lynch J, et al.  
602 Evidence for Efficient Vertical Transfer of Maternal HIV-1 Envelope-Specific Neutralizing  
603 Antibodies but No Association of Such Antibodies With Reduced Infant Infection. *JAIDS J*  
604 *Acquired Immune Defic Syndromes.* 2013;64:163-6.
- 605 [20] Markham RB, Gomez J, Halsey NA, Coberly J, Ruff A, Holt E, et al. Maternal IgG1 and  
606 IgA antibody to V3 loop consensus sequence and maternal-infant HIV-1 transmission. *The*  
607 *Lancet.* 1994;343:390-1.
- 608 [21] Permar SR, Fong Y, Vandergrift N, Fouda GG, Gilbert P, Parks R, et al. Maternal HIV-1  
609 envelope-specific antibody responses and reduced risk of perinatal transmission. *The Journal of*  
610 *Clinical Investigation.* 2015;125:2702-6.
- 611 [22] Moody MA, Gao F, Gurley TC, Amos JD, Kumar A, Hora B, et al. Strain-specific V3 and  
612 CD4 binding site autologous HIV-1 neutralizing antibodies select neutralization-resistant viruses.  
613 *Cell host & microbe.* 2015;18:354-62.
- 614 [23] Kumar A, Smith CEP, Giorgi EE, Eudailey J, Martinez DR, Yusim K, et al. Infant  
615 transmitted/founder HIV-1 viruses from peripartum transmission are neutralization resistant to  
616 paired maternal plasma. *PLoS Pathog.* 2018;14:e1006944.
- 617 [24] Wright PF, Lambert JS, Gorse GJ, Hsieh RH, McElrath MJ, Weinhold K, et al.  
618 Immunization with envelope MN rgp120 vaccine in human immunodeficiency virus-infected  
619 pregnant women. *J Infect Dis.* 1999;180:1080-8.
- 620 [25] Salazar-Gonzalez JF, Bailes E, Pham KT, Salazar MG, Guffey MB, Keele BF, et al.  
621 Deciphering human immunodeficiency virus type 1 transmission and early envelope  
622 diversification by single-genome amplification and sequencing. *J Virol.* 2008;82:3952-70.
- 623 [26] Gouy M, Guindon S, Gascuel O. SeaView version 4: A multiplatform graphical user  
624 interface for sequence alignment and phylogenetic tree building. *Mol Biol Evol.* 2010;27:221-4.
- 625 [27] Kirchherr JL, Lu X, Kasongo W, Chalwe V, Mwananyanda L, Musonda RM, et al. High  
626 throughput functional analysis of HIV-1 env genes without cloning. *J Virol Methods.*  
627 2007;143:104-11.
- 628 [28] Montefiori DC. Measuring HIV neutralization in a luciferase reporter gene assay. *Methods*  
629 *Mol Biol.* 2009;485:395-405.
- 630 [29] Seaman MS, Janes H, Hawkins N, Grandpre LE, Devoy C, Giri A, et al. Tiered  
631 categorization of a diverse panel of HIV-1 Env pseudoviruses for assessment of neutralizing  
632 antibodies. *J Virol.* 2010;84:1439-52.
- 633 [30] Tomaras GD, Yates NL, Liu P, Qin L, Fouda GG, Chavez LL, et al. Initial B-Cell  
634 Responses to Transmitted Human Immunodeficiency Virus Type 1: Virion-Binding  
635 Immunoglobulin M (IgM) and IgG Antibodies Followed by Plasma Anti-gp41 Antibodies with  
636 Ineffective Control of Initial Viremia. *J Virol.* 2008;82:12449-63.
- 637 [31] Team RC. R: A language and environment for statistical computing. R Foundation for  
638 Statistical  
639 Computing; 2019.
- 640 [32] Fouda GG, Martinez DR, Swamy GK, Permar SR. The Impact of IgG transplacental transfer  
641 on early life immunity. *Immunohorizons.* 2018;2:14-25.

- 642 [33] Connor EM, Sperling RS, Gelber R, Kiselev P, Scott G, O'Sullivan MJ, et al. Reduction of  
643 maternal-infant transmission of human immunodeficiency virus type 1 with zidovudine  
644 treatment. Pediatric AIDS Clinical Trials Group Protocol 076 Study Group. *N Engl J Med.*  
645 1994;331:1173-80.
- 646 [34] McElrath MJ. Adjuvants: tailoring humoral immune responses. *Curr Opin HIV AIDS.*  
647 2017;12:278-84.
- 648 [35] Phillips B, Van Rompay KKA, Rodriguez-Nieves J, Lorin C, Koutsoukos M, Tomai M, et  
649 al. Adjuvant-Dependent Enhancement of HIV Env-Specific Antibody Responses in Infant  
650 Rhesus Macaques. *J Virol.* 2018;92.
- 651 [36] Moody MA, Santra S, Vandergrift NA, Sutherland LL, Gurley TC, Drinker MS, et al. Toll-  
652 like receptor 7/8 (TLR7/8) and TLR9 agonists cooperate to enhance HIV-1 envelope antibody  
653 responses in rhesus macaques. *J Virol.* 2014;88:3329-39.
- 654 [37] Haberg SE, Trogstad L, Gunnes N, Wilcox AJ, Gjessing HK, Samuelsen SO, et al. Risk of  
655 fetal death after pandemic influenza virus infection or vaccination. *N Engl J Med.* 2013;368:333-  
656 40.
- 657 [38] Mabuka J, Nduati R, Odem-Davis K, Peterson D, Overbaugh J. HIV-specific antibodies  
658 capable of ADCC are common in breastmilk and are associated with reduced risk of transmission  
659 in women with high viral loads. *PLoS Pathog.* 2012;8:e1002739.
- 660 [39] Himes JE, Goswami R, Mangan RJ, Kumar A, Jeffries TL, Jr., Eudailey JA, et al.  
661 Polyclonal HIV envelope-specific breast milk antibodies limit founder SHIV acquisition and  
662 cell-associated virus loads in infant rhesus monkeys. *Mucosal Immunol.* 2018;11:1716-26.  
663

664

665

666

667

668

669

670

671

672

673

674

675

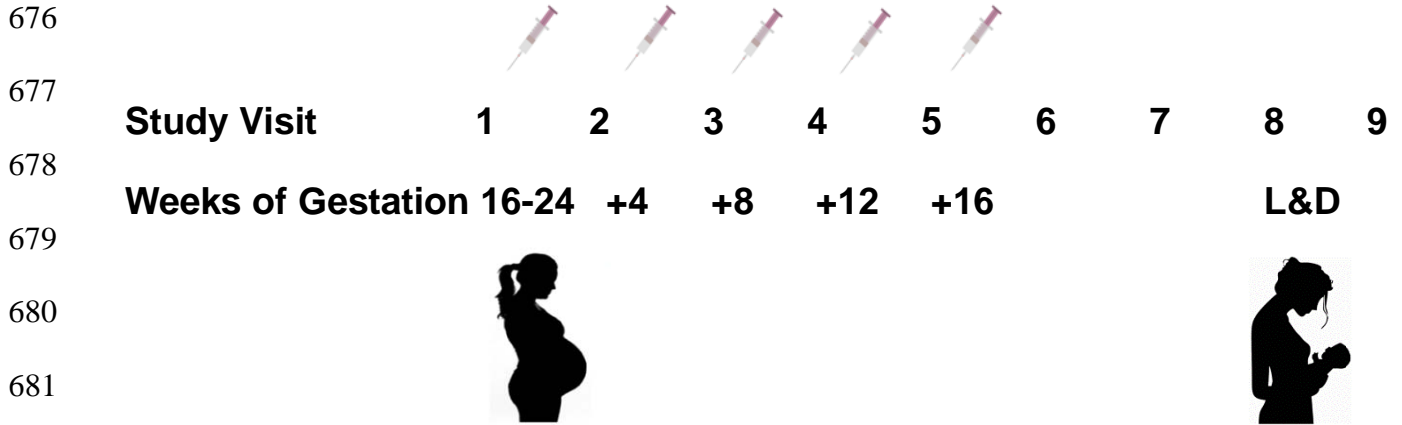

683 **FIGURE 1. Immunization schedule in AVEG102/104 studies.** Pregnant, HIV-  
684 infected women with  $CD4^+$  T cell counts  $> 400/mm^3$  were enrolled in the AVEG  
685 102/104 studies. In the AVEG 102 protocol, women were administered 640  $\mu g$  of  
686 gp160 (n=1) or placebo (n=1). In the AVEG 104 protocol, women received 300  $\mu g$  of  
687 gp120 + alum (n=17) or placebo (alum + diluent) (n=9). The primary immunization  
688 was given at Visit 2, between 16-24 weeks of gestation. Monthly booster injections  
689 were subsequently given 4 weeks apart for the duration of pregnancy (Visits 3-6) for  
690 up to 5 total immunizations (median: 5; range 4-5). Visit 9 was labor and delivery.

687

688

689

690

691

692

693

694

695

696

697

698

699  
700  
701  
702  
703  
704  
705  
706  
707  
708  
709  
710  
711  
712  
713  
714  
715  
716  
717  
718  
719  
720  
721

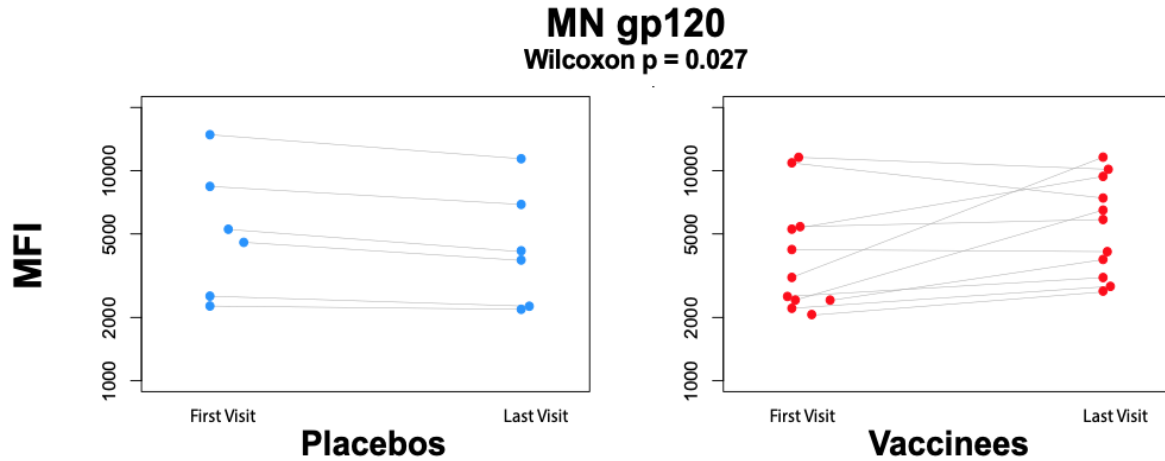

**FIGURE 2. MN gp120-specific binding in vaccinees and placebo recipients at first and last visit.** Comparison of changes in gp120-specific binding from the first to the last visit between vaccinees (red) and placebo (blue). The between-visits change in gp120-specific binding was statistically significantly higher in vaccinees ( $p=0.027$  by 2-sided Wilcoxon test). Light gray lines link the same mother.

722  
723  
724  
725  
726  
727  
728  
729  
730  
731  
732  
733  
734  
735  
736  
737  
738  
739  
740  
741  
742  
743  
744

|                     |                     |               | <b>MN<br/>gp120</b> | <b>Linear<br/>V3.B</b> | <b>gp70<br/>V1/V2</b> | <b>MN.3<br/>Neut</b> |
|---------------------|---------------------|---------------|---------------------|------------------------|-----------------------|----------------------|
| <b>Vaccinee</b>     | <b>AVEG<br/>104</b> | <b>10485S</b> | x                   | x                      | x                     | x                    |
|                     |                     | <b>104ERE</b> | x                   | x                      | x                     | x                    |
|                     |                     | <b>104FHY</b> | x                   | x                      | ✓                     | x                    |
|                     |                     | <b>104IR6</b> | ✓                   | ✓                      | ✓                     | ✓                    |
|                     |                     | <b>104IRF</b> | x                   | ✓                      | x                     | x                    |
|                     |                     | <b>10485T</b> | x                   | x                      | ✓                     | x                    |
|                     |                     | <b>104GA1</b> | x                   | x                      | x                     | x                    |
|                     |                     | <b>104IR9</b> | x                   | x                      | x                     | x                    |
|                     |                     | <b>104IRB</b> | x                   | x                      | x                     | x                    |
|                     |                     | <b>104IRC</b> | x                   | x                      | x                     | x                    |
| <b>AVEG<br/>102</b> | <b>102I1G</b>       | x             | x                   | x                      | x                     |                      |
| <b>Placebo</b>      | <b>AVEG<br/>104</b> | <b>104ERF</b> | x                   | x                      | x                     | x                    |
|                     |                     | <b>104FHX</b> | x                   | x                      | x                     | x                    |
|                     |                     | <b>104HXS</b> | x                   | x                      | ✓                     | x                    |
|                     |                     | <b>104IRD</b> | x                   | x                      | x                     | x                    |
|                     |                     | <b>104IRG</b> | x                   | x                      | x                     | x                    |
| <b>AVEG<br/>102</b> | <b>102I1F</b>       | x             | x                   | x                      | x                     |                      |

**FIGURE 3. Change in antibody binding response against MN.3 gp120, linear V3.B, gp70 V1V2 and neutralization response against MN.3 before and after vaccination.**

Vaccinees (red) or placebo recipients (blue). Check marks indicate a three-fold increase.

745

746

747

748

749

750

751

752

753

754

755

756

757

758

759

760

761

762

763

764

765

766

767

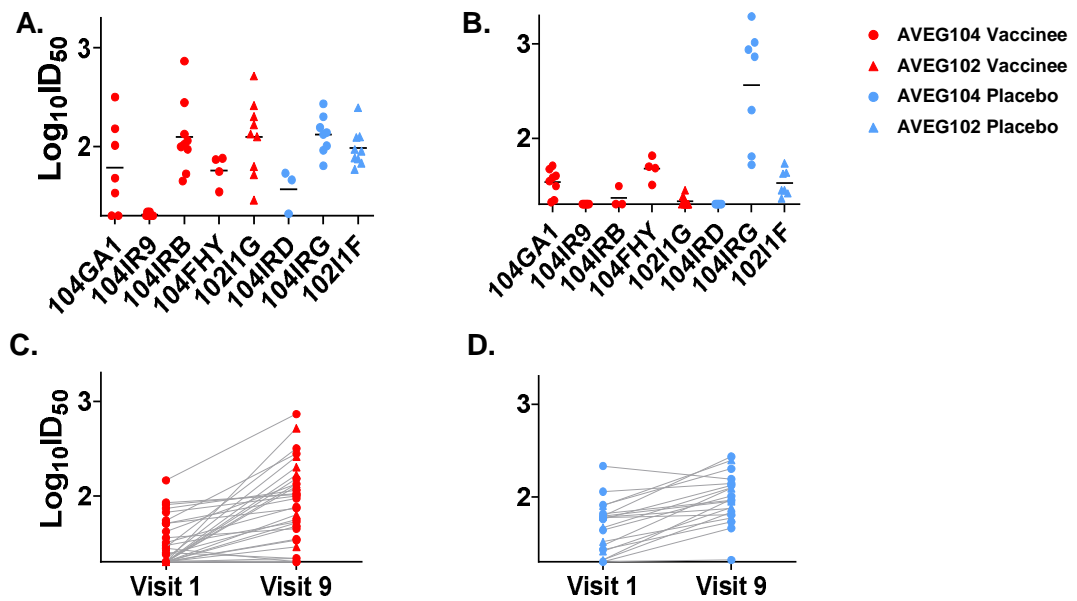

**FIGURE 4. Neutralization of viruses isolated from vaccine and placebo recipient plasma during early and late pregnancy by autologous maternal plasma collected at delivery.** For each vaccine and placebo recipient, the neutralization potency of maternal plasma at delivery was assessed against the early pregnancy (Visits 1,4) (A) and late pregnancy (Visits 5-9) (B) autologous virus populations. The left y-axis depicts neutralization potency, in log<sub>10</sub>ID<sub>50</sub>. Study participants are displayed on the X axis (A,B). AVEG104 study participants are depicted with circles; AVEG 102 study participants with triangles. Vaccine recipients are shown in red; placebos in blue. Bars represent geometric means. Change in neutralization potency of autologous maternal plasma from Visits 1 (pre-immunization) and 9 (delivery) are shown against early pregnancy plasma viruses (C,D), with the exception off autologous viruses isolated from Visit 4 in mother 104FHY.

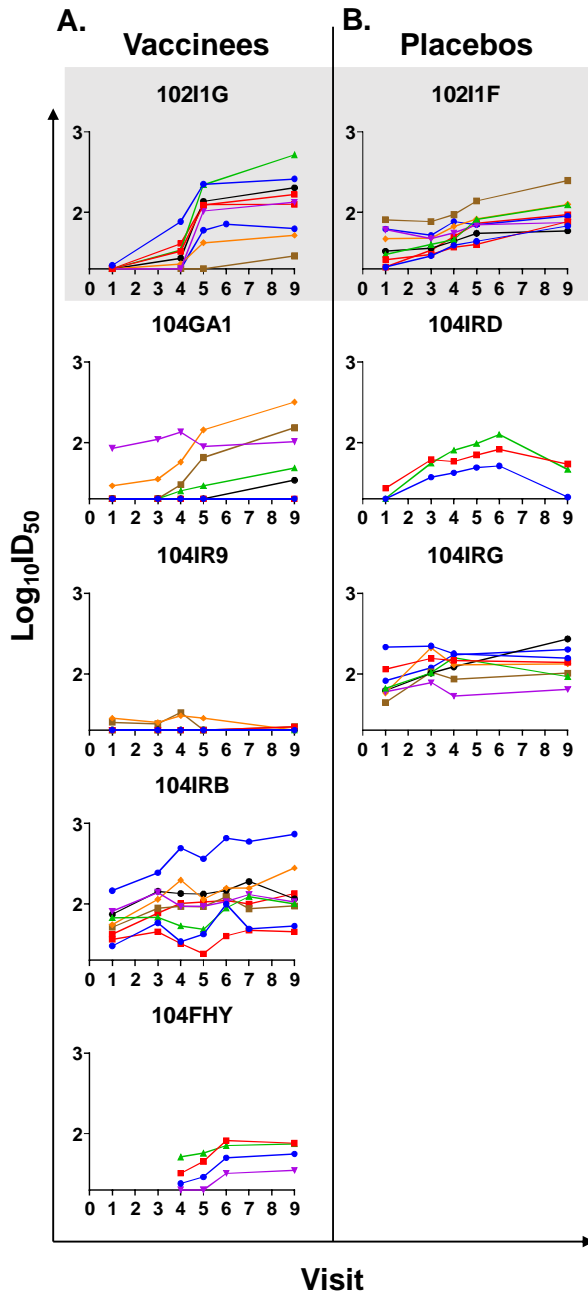

**FIGURE 5. Neutralization potency of autologous maternal plasma against plasma viruses isolated from early pregnancy.** Maternal plasma from pre-immunization (Visit 1), booster visits (Visits 3, 4, 5, & 6) and post-immunization (Visits 7 & 9) was tested against individual virus variants from Visit 1 (except for 104FHY; virus variants are from Visit 4). Each colored line represents a different virus. The left y-axis depicts neutralization potency, in  $\text{log}_{10}\text{ID}_{50}$ . AVEG 102 study participants are shown on the top row, shaded in gray. With additional gp160 doses, there is a greater boost in neutralization potency against autologous viruses in the gp160 vaccine recipient compared to the placebo. There does not appear to be an increase in autologous virus neutralization with gp120 vaccination compared to placebo.



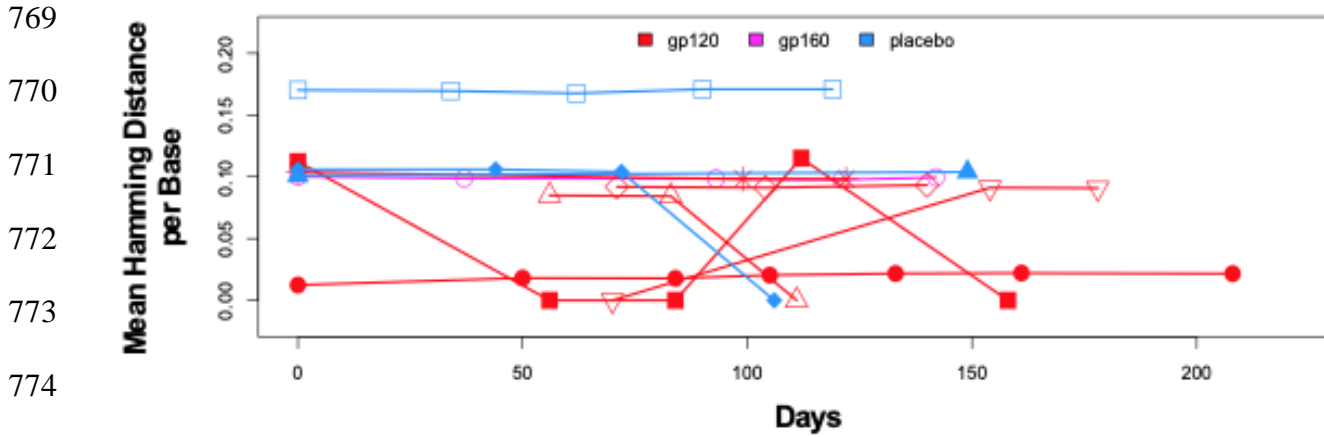

776 **FIGURE 6. Comparison of change in intersequence Hamming distance per base pair of**  
777 ***env* sequences obtained from vaccinees (n=7) and placebo recipients (n=3) across**  
778 **study visits in days. Each shape is an individual mother. Gp120 (red), gp160 (pink), placebo**  
779 **(blue).**

780

781

782

783

784

785

786

787

788

789

790

791

792  
793  
794  
795  
796  
797  
798  
799  
800  
801  
802  
803  
804  
805  
806  
807  
808  
809  
810  
811  
812  
813  
814

| Study Cohort | Maternal ID | Treatment | Visit      | Visit Date | Number of maternal <i>env</i> gene BGAs | Number of functional PBVs |
|--------------|-------------|-----------|------------|------------|-----------------------------------------|---------------------------|
| AVEG 102     | 10211F      | placebo   | 1          | 5/21/1993  | 15                                      | 9                         |
|              |             |           | 3          | 6/24/1993  | 17                                      |                           |
|              |             |           | 4          | 7/22/1993  | 6                                       |                           |
|              |             |           | 5          | 8/19/1993  | 9                                       |                           |
|              |             |           | 6          | 9/16/1993  |                                         |                           |
|              | 10211G      | gp180     | 9          | 9/17/1993  | 21                                      | 7                         |
|              |             |           | 1          | 9/14/1993  | 31                                      | 9                         |
|              |             |           | 4          | 10/21/1993 | 15                                      |                           |
|              |             |           | 5          | 12/18/1993 | 17                                      |                           |
|              |             | 6         | 1/13/1994  | 8          |                                         |                           |
|              |             | 9         | 2/3/1994   | 21         |                                         |                           |
|              |             |           |            |            |                                         | 12                        |
| AVEG 104     | 104ERE      | gp120     | 2          | 8/17/1993  | 12                                      |                           |
|              |             |           | 4          | 8/12/1993  |                                         |                           |
|              |             |           | 5          | 9/6/1993   |                                         |                           |
|              |             |           | 6          | 12/8/1993  |                                         |                           |
|              |             |           | 9          | 10/18/1993 |                                         |                           |
|              | 104FHY      | gp120     | 1          | 10/18/1994 | 7                                       | 4                         |
|              |             |           | 4          | 12/28/1994 |                                         |                           |
|              |             |           | 5          | 1/30/1995  |                                         |                           |
|              |             |           | 6          | 3/7/1995   |                                         |                           |
|              |             |           | 9          | 4/5/1995   |                                         |                           |
|              | 104IR6      | gp120     | 1          | 8/23/1993  | 1                                       |                           |
|              |             |           | 3          | 5/4/1993   |                                         |                           |
|              |             |           | 4          | 8/1/1993   |                                         |                           |
|              |             |           | 5          | 9/29/1993  |                                         |                           |
|              |             |           | 6          | 10/27/1993 |                                         |                           |
|              |             |           | 7          | 11/24/1993 |                                         |                           |
|              |             |           | 9          | 12/18/1993 |                                         |                           |
|              | 104GA1      | gp120     | 1          | 10/25/1993 | 8                                       | 7                         |
|              |             |           | 3          | 11/30/1993 |                                         |                           |
|              |             |           | 4          | 1/4/1994   |                                         |                           |
|              |             |           | 5          | 2/1/1994   |                                         |                           |
|              |             |           | 9          | 2/24/1994  |                                         |                           |
|              | 104IR9      | gp120     | 1          | 1/20/1994  | 24                                      | 8                         |
|              |             |           | 3          | 3/17/1994  |                                         |                           |
|              |             |           | 4          | 4/14/1994  |                                         |                           |
|              |             |           | 5          | 5/12/1994  |                                         |                           |
|              |             |           | 9          | 8/27/1994  |                                         |                           |
|              | 104IRB      | gp120     | 1          | 4/20/1994  | 10                                      | 9                         |
|              |             |           | 3          | 6/9/1994   |                                         |                           |
|              |             |           | 4          | 7/13/1994  |                                         |                           |
| 5            |             |           | 8/3/1994   |            |                                         |                           |
| 6            |             |           | 8/31/1994  |            |                                         |                           |
| 7            |             |           | 9/25/1994  |            |                                         |                           |
| 9            |             |           | 11/14/1994 |            |                                         |                           |
| 104IRD       | placebo     | 1         | 4/18/1994  | 3          | 3                                       |                           |
|              |             | 3         | 6/9/1994   |            |                                         |                           |
|              |             | 4         | 7/7/1994   |            |                                         |                           |
|              |             | 5         | 8/4/1994   |            |                                         |                           |
|              |             | 6         | 9/12/1994  |            |                                         |                           |
| 104IRG       | placebo     | 9         | 9/14/1994  | 4          | 3                                       |                           |
|              |             | 1         | 11/1/1994  |            |                                         |                           |
|              |             | 3         | 12/15/1994 |            |                                         |                           |
|              |             | 4         | 1/12/1995  |            |                                         |                           |
|              |             | 9         | 2/15/1995  |            |                                         |                           |

TABLE 1. Number of maternal *env* gene sequences isolated and functional pseudoviruses produced from each maternal plasma sample.

815  
816  
817  
818  
819  
820  
821  
822  
823  
824  
825  
826  
827  
828  
829  
830  
831  
832  
833  
834  
835  
836  
837

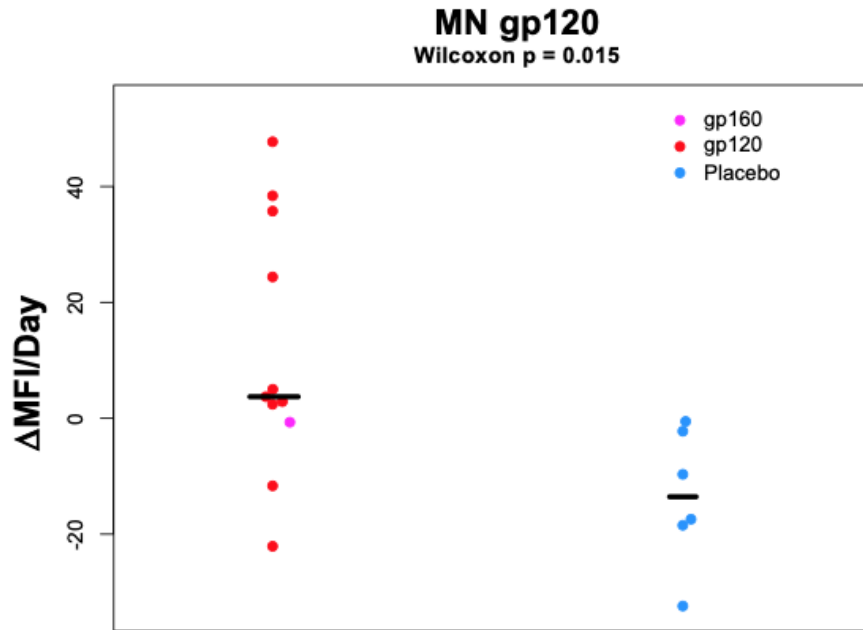

**FIGURE S1. Change in MN gp120-specific binding per day in vaccinees and placebo recipients between first and last visit.** Comparison of changes in gp120-specific binding per day from the first to the last visit between vaccinees (red or pink) and placebo (blue). The gp120-specific binding increase per day was higher in vaccinees compared to placebo ( $p=0.015$  by 2-sided Wilcoxon test).

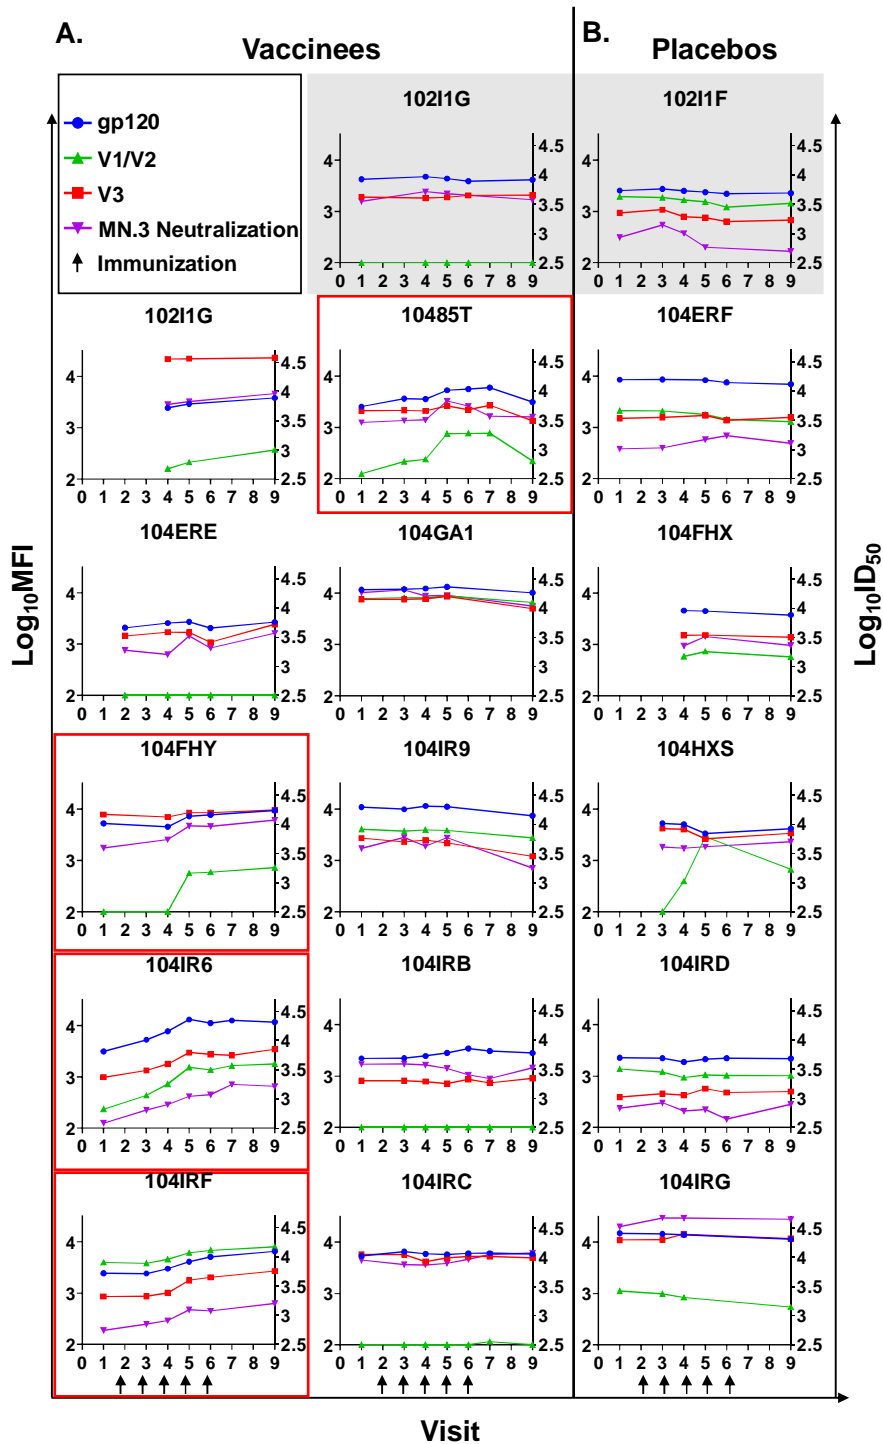

**FIGURE S2. HIV Env gp120, V1V2, and V3-specific IgG binding and neutralizing Ab responses in HIV-infected, pregnant women immunizations with MN gp120 or gp160.** The left y-axis depicts binding antibody response, in  $\text{log}_{10}\text{MFI}$ , and gp120 binding responses are indicated by the blue lines, V3 responses by the red lines, and V1V2 responses by the green lines. The right y-axis depicts neutralization potency, in  $\text{log}_{10}\text{ID}_{50}$ , and is indicated by the purple lines. AVEG 102 study participants are shown on the top row, shaded in gray. Red boxing indicates 3-fold increase in gp120, V1V2, V3, or neutralizing antibody responses over time.

839  
840  
841  
842  
843  
844  
845  
846  
847  
848  
849  
850  
851  
852  
853  
854  
855  
856  
857  
858  
859  
860  
861

|                                                     |           | Vaccines |        |        |        |        | Placebo |        |        |                                                                     |
|-----------------------------------------------------|-----------|----------|--------|--------|--------|--------|---------|--------|--------|---------------------------------------------------------------------|
|                                                     |           | 104GA1   | 104IR9 | 104IRB | 104FHY | 10211G | 104IRD  | 104IRG | 10211F |                                                                     |
| Virus ID                                            |           |          |        |        |        |        |         |        |        |                                                                     |
| <b>Early Autologous Plasma Viruses (Visits 1,4)</b> | <b>1</b>  | <20      | <20    | 53     | 56     | 261    | 21      | 156    | 68     | <b>ID<sub>50</sub></b><br><20<br>20-60<br>61-180<br>181-540<br>>540 |
|                                                     | <b>2</b>  | <20      | 22     | 45     | 76     | 167    | 54      | 139    | 77     |                                                                     |
|                                                     | <b>3</b>  | 48       | <20    | 100    | 74     | 519    | 46      | 92     | 124    |                                                                     |
|                                                     | <b>4</b>  | 103      | <20    | 106    | 35     | 134    |         | 64     | 75     |                                                                     |
|                                                     | <b>5</b>  | 317      | 20     | 279    |        | 52     |         | 133    | 126    |                                                                     |
|                                                     | <b>6</b>  | 34       | <20    | 115    |        | 202    |         | 271    | 59     |                                                                     |
|                                                     | <b>7</b>  | 152      | 22     | 94     |        | 29     |         | 102    | 248    |                                                                     |
|                                                     | <b>8</b>  |          |        | 733    |        | 63     |         | 201    | 90     |                                                                     |
|                                                     | <b>9</b>  |          |        | 134    |        | 126    |         |        | 94     |                                                                     |
| <b>Late Autologous Plasma Viruses (Visits 5-9)</b>  | <b>1</b>  | 40       | <20    | 31     | 65     | 28     | <20     | 52     | 23     |                                                                     |
|                                                     | <b>2</b>  | 47       | <20    | <20    | 48     | 24     | <20     | 64     | 54     |                                                                     |
|                                                     | <b>3</b>  | 38       | <20    | <20    | 50     | <20    | <20     | 730    | 26     |                                                                     |
|                                                     | <b>4</b>  | 31       | <20    |        | 32     | <20    | <20     | 1939   | 28     |                                                                     |
|                                                     | <b>5</b>  | 22       | <20    |        |        | <20    | <20     | 198    | 28     |                                                                     |
|                                                     | <b>6</b>  | 51       | <20    |        |        | <20    | <20     | 864    | 42     |                                                                     |
|                                                     | <b>7</b>  | 35       | <20    |        |        | 23     | <20     | 1030   | 43     |                                                                     |
|                                                     | <b>8</b>  | 21       | <20    |        |        | <20    |         |        |        |                                                                     |
|                                                     | <b>9</b>  |          |        |        |        | 21     |         |        |        |                                                                     |
|                                                     | <b>10</b> |          |        |        |        | 21     |         |        |        |                                                                     |
|                                                     | <b>11</b> |          |        |        |        | <20    |         |        |        |                                                                     |

**FIGURE S3. Neutralization of viruses isolated from vaccine and placebo recipient plasma during early and late pregnancy by autologous maternal plasma collected at delivery.** For each vaccine and placebo recipient, the neutralization potency of maternal plasma at delivery was assessed against the early (Visits 1,4) and late pregnancy (Visits 5-9) autologous virus populations. Higher ID<sub>50</sub> (darker color) represents greater neutralization potency.

862  
863  
864  
865  
866  
867  
868  
869  
870  
871  
872  
873  
874  
875  
876  
877  
878  
879  
880  
881  
882  
883  
884

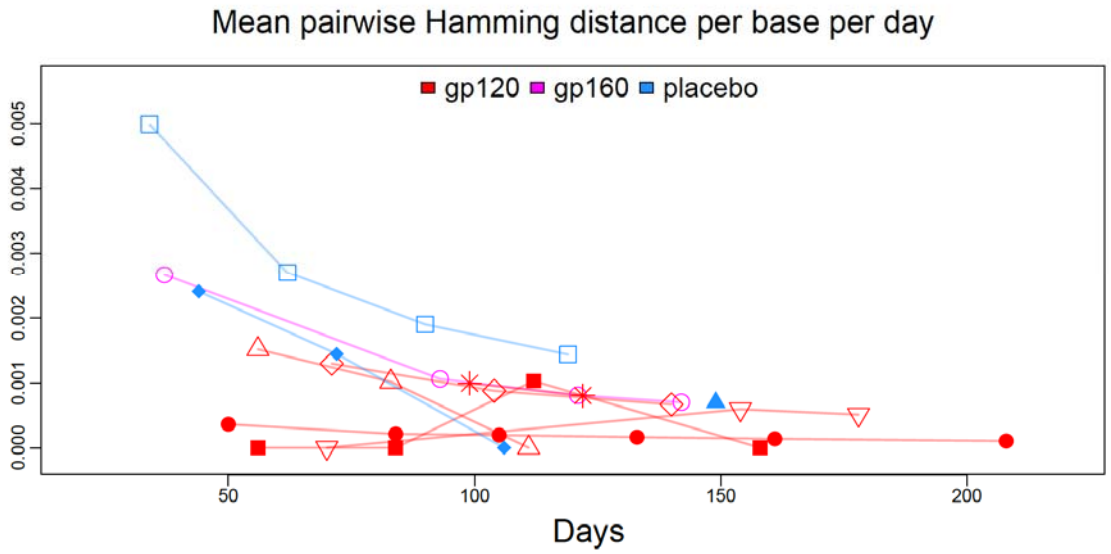

**FIGURE S4. Comparison of change in intersequence Hamming distance per base pair per day of *env* sequences obtained from vaccinees (n=7) and placebo recipients (n=3) across study visits. Each shape is an individual mother. Gp120 (red), gp160 (pink), placebo (blue).**

| Assay | Protein           | Peptide                                                                          | Sequence                                                                                                                                                                                                                                                                                                                                                                                                                                                                                                                     |
|-------|-------------------|----------------------------------------------------------------------------------|------------------------------------------------------------------------------------------------------------------------------------------------------------------------------------------------------------------------------------------------------------------------------------------------------------------------------------------------------------------------------------------------------------------------------------------------------------------------------------------------------------------------------|
| BAMA  | MN gp120          |                                                                                  | TEKLWVTVYYGVVWKEATTLFCASDAKAYDTEAHNVWATHACVPTDPNPQEVVELVN<br>VTENFNMWKNMVEQMHEDIISLWDQSLKPCVKLTPLCVTLNCTDLRNTTNTNNSSTDN<br>NNSKSEGTIKGEMKNCSFNITTSIGDKMQKEYALLYKLDIEPIDNDSTSYRLISCNT<br>SVITQACPKISFEPIPIHYCAPAGFAILKCNCKKFSKGSKCNVSTVQCTHGIRPVVS<br>TQLLLNGSLAEEEVIRSEDFTDNAKTIIVHLKESVQINCTRPNYNKRKRRIHIGPGRA<br>FYTTKNIKGTIRQAHCIIISRAKWNDRQIVSKLKEQFKNKTIIVFNPSGGDPEIVMH<br>SFNCGGEFFYCNTSPLFNSIWNNGNTWNNTTGSNNNITLQCKIKQIINMWQKVGKAMY<br>APPLEGQIRCSSNITGLLLTRDGGEDDTNDTEIFRPGGDMRDNRSELYKYKVVTI<br>EPLGVAPTAKRRRVQREKR |
|       |                   |                                                                                  | TVQARLLLSGIVQQNNLLRAIEAQONMLQLTVWGIKQLQARVQAVERYLKDQQLLGF<br>WGCSGKLICTTTPWNASWSNKSLLDIWNMTWMQWEREIDNYTSLIYSLLEKSQTQQ<br>EKNEQELGLDKWESLWNWFDITNLENRVRQGYSPSLQTRPPVPRGPDPEGIEEEE<br>GGERDRDTSGRLVHGFLAIIWVD                                                                                                                                                                                                                                                                                                                  |
|       | Bio-V3.B          | NNTRKSIHIGPGRFYATGDIIGDIRQAHC                                                    |                                                                                                                                                                                                                                                                                                                                                                                                                                                                                                                              |
|       | gp70 B.MN V3      | TRPNYNKRKRRIHIGPGRFYTTKNIKGTIRQAH                                                |                                                                                                                                                                                                                                                                                                                                                                                                                                                                                                                              |
|       | gp70 B.CaseA V1V2 | CIDLRNATNATSNSNTTNTSSSGGLMMEQGEIKNCSFNITTSIRDKVQKEYALFYKL<br>DIVPIDNPKNSTNYRLISC |                                                                                                                                                                                                                                                                                                                                                                                                                                                                                                                              |

885

**TABLE S1. Amino acid sequences for antigens used in AVEG102/104 plasma binding antibody multiplex assays (BAMA).**
